# Supplementary material for: Amelotin: an enamel matrix protein that experienced distinct evolutionary histories in amphibians, sauropsids and mammals
Source: PubMed Central journal article supplement (PMC4373244; doi:10.1186/s12862-015-0329-x), 2015-03-14
Supplement: 12862_2015_329_MOESM1_ESM.pdf [file 12862_2015_329_MOESM1_ESM.pdf]

| <b>Genus Species</b>                 | <b>Common name</b>      | <b>Family and Order</b>           | <b>Sources</b>          |
|--------------------------------------|-------------------------|-----------------------------------|-------------------------|
| Mammalia                             |                         |                                   |                         |
| <i>Bos taurus</i>                    | Cow                     | Bovidae, Artiodactyla             | XM_870725               |
| <i>Homo sapiens</i>                  | Human                   | Hominidae, Primates               | NM_212557               |
| <i>Loxodonta africana</i>            | African elephant        | Elephantidae, Proboscidea         | XM_003414063            |
| <i>Monodelphis domestica</i>         | Opossum                 | Didelphidae, Didelphimorphia      | XM_007495514            |
| <i>Mus musculus</i>                  | Mouse                   | Muridae, Rodentia                 | NM_027793.1             |
| <i>Ornithorhynchus anatinus</i>      | Platypus                | Ornithorhynchidae, Monotremata    | OANA5                   |
| Sauropsida                           |                         |                                   |                         |
| <i>Alligator mississippiensis</i>    | American alligator      | Alligatoridae, Crocodylia         | allMis0.2               |
| <i>Anolis carolinensis</i>           | Green anole             | Iguanidae, Squamata               | XM_008103694 / KM069435 |
| <i>Caiman crocodilus</i>             | Spectacled caiman       | Alligatoridae, Crocodylia         | KM069444                |
| <i>Chelonia mydas</i>                | Green sea turtle        | Cheloniidae, Testudines           | CheMyd_1.0              |
| <i>Anas platyrhynchos</i>            | Mallard duck            | Anatidae, Anseriformes            | BGI_duck_1.0            |
| <i>Ophiophagus hannah</i>            | King cobra              | Elapidae, Squamata                | SAMN02439592            |
| <i>Python molurus</i>                | Indian python           | Pythonidae, Squamata              | PytMol_1.0              |
| <i>Python regius</i>                 | Royal python            | Pythonidae, Squamata              | KM069438                |
| <i>Takydromus sexlineatus</i>        | Long-tailed lizard      | Lacertidae, Squamata              | KM069441                |
| <i>Tarentola mauritanica</i>         | Common wall gecko       | Gekkonidae, Squamata              | KM069446                |
| Amphibia                             |                         |                                   |                         |
| <i>Pleurodeles waltl</i>             | Sharp-ribbed salamander | Salamandridae, Caudata            | KM069436                |
| <i>Xenopus (Silurana) tropicalis</i> | Clawed frog             | Pipidae, Anura                    | KM069437                |
| Coelacanthid                         |                         |                                   |                         |
| <i>Latimeria chalumnae</i>           | Coelacanth              | Coelacanthidae, Coelacanthiformes | LatCha1                 |

**Additional file 1.**
