# Supplementary material for: Amelotin: an enamel matrix protein that experienced distinct evolutionary histories in amphibians, sauropsids and mammals
Source: PubMed Central journal article supplement (PMC4373244; doi:10.1186/s12862-015-0329-x), 2015-03-14
Supplement: 12862_2015_329_MOESM2_ESM.pdf [file 12862_2015_329_MOESM2_ESM.pdf]

**Additional file 2. Amelotin (AMTN) sequences.** In bold: from cDNA sequences. ?: unknown residues. \*: Stop codon.

MAMMALIA

Primates

>AMTN *Homo sapiens* [NM\_212557.2]

MRSTILLFCLLGSTRSLPQLKPALGLPPTKLPADQGTLPNQOQSNQVFPSSLSLIPLTQMLTLGPDHLHLLNPAAGMTPGTQTHPLTLGGLNVQQQLHPHVLPIFVTQLGA  
QGTTLSSEELPQIFTSLSIIHSLFPGGILPTSQAGANPDVQDGSPPAGGAGVNPATQGTTPAGRLPTPSGTDDDFAVTTPAGIQRSTHAI E EATTESANGIQ\*

>AMTN *Pan troglodytes*

MRSTILLFCLLGSTRSLPQLKPALGLPPTKLPADQGTLPNQOQSNQVFPSSLSLIPLTQMLTLGPDHLHLLNPAAGMTPGTQTHPLTLGGLNVQQQLHPHVLPIFVTQLGA  
QGTTLSSEELPQIFTSLSIIHSLFPGGILPTSQAGANPDVQDGSPPAGGAGVNPATQGTTPAGRLPTPSGTDDDFAVTTPADIQRSTRAIE EATTESANGIQ\*

>AMTN *Pan paniscus*

MRSTILLFCLLGSTRSLPQLKPALGLPPTKLPADQGTLPNQOQSNQVFPSSLSLIPLTQMLTLGPDHLHLLNPAAGMTPGTQTHPLTLGGLNVQQQLHPHVLPIFVTQLGA  
QGTTLSSEELPQIFTSLSIIHSLFPGGILPTSQAGANPDVQDGSPPAGGAGVNPATQGTTPAGRLPTPSGTDDDFAVTTPADIQRSTRAIE EATTESANGIQ\*

>AMTN *Gorilla gorilla*

MRSTILLFCLLGSTRSLPQLKPALGLPPTKLPADQGTLPNQOQSNQVFPSSLSLIPLTQMLTLGPDHLHLLNPAAGMTPGTQTHPLTLGGLNVQQQLHPHMLPIFVTQLGA  
QGTTLSSEELPQIFTSLSIIHSLFPGGILPTSQAGANPDVQDGSPPAGGAGVNPATQGTTPAGRLPTPSGTDDDFAVTTPAGIQRSTRAIE ETTTESANGIQ\*

>AMTN *Pongo pygmaeus*

MKTTILLFCLLGSTRSLPQLKPALGLPPTKRAPDQGTLPNQOQSNQVFPSSLSLIPLTQMLTLGPDHLHLLNPAAGMTPGTQTHPLTLGGLNVQQQLHPHMLPIFVTQLGA  
QGTTLSSEELPQIFTSLSIIHSLFPGGILPTSQAGANPDVQDGSPPGGAGVNPATQGTTPAGRLPTPSGTDDDFAVTTPAGIQRSTRAIE ETTTESANGIQ\*

>AMTN *Pongo abelii*

MKTTILLFCLLGSTRSLPQLKPALGLPPTKRAPDQGTLPNQOQSNQVFPSSLSLIPLTQMLTLGPDHLHLLNPAAGMTPGTQTHPLTLGGLNVQQQLHPHMLPIFVTQLGA  
QGTTLSSEELPQIFTSLSIIHSLFPGGILPTSQAGANPDVQDGSPPGGAGVNPATQGTTPAGRLPTPSGTDDDFAVTTPAGIQRNTRAI EETNTTESANGIQ\*

>AMTN *Nomascus leucogenys*

MKTTMLLFCLLGSTRSLPQLKPALGLPPTKLPADQGTLPNQOQSNQVFPSSLSLIPLTQMLTLGPDHLHLLNPAAGMTPGTQTHPLTLGGLNIQQQLHPHILPIFVTQLGA  
QGTTLSSEELPQIFTSLSIIHSLFPGGILPTSQAGANPDVQDGSPPAGGAGVNPATQGTTPAGRLPTPSGTDDDFAVTTPAGIQRNTHAI EETTTESANGIE\*

>AMTN *Macaca mulatta*

MKTMILLFCLLGSTQSLPQLKPALGLPPTKLPADQGTLPNQOQSNQVFPSSLSLIPLTQMLTLGPDHLHLLNPAAGMTPGTQAHPLTLGVLNLPQQLQPHMLPIFVTQLGA  
QGTTLSSEELPQIFTSLSIIHSLFPGGILPTSQAGANPDVQDGSPPAGQAGVNPATQGTTPAGRLPTPSGTDDDFAVTTPAGIQRSTHATE ETTTE\*

>AMTN *Macaca fascicularis*

MKTMILLFCLLGSTQSLPQLKPALGLPPTKLPADQGTLPNQOQSNQVFPSSLSLIPLTQMLTLGPDHLHLLNPAAGMTPGTQAHPLTLGVLNLPQQLQPHMLPIFVTQLGA  
QGTTLSSEELPQIFTSLSIIHSLFPGGILPTSQAGANPDVQDGSPPAGQAGVNPATQGTTPAGRLPTPSGTDDDFAVTTPAGIQRSTHATE ETTTE\*

>AMTN *Nasalis larvatus*

MKTMILLFCLLGSTQSLPQLKPALGLPPTKLPADQGTLPNQOQSNQVFPSSLSLIPLTQMLTLGPDHLHLLNPAAGMTPGTQAHPLTLGVLNLPQQLQPHMLPIFVTQVGA  
QGTTLSSEELPQIFTSLSIIHSLFPGGILPTSQAGANPDVQDGSPPAGQAGVNPATQGTTPAGRLPTPSGTDDDFAVTTPAGIQRSTHATE ETTTESPNGIQ\*

>AMTN *Papio anubis*

MKTMILLFCLLGSTQSLPQLKPALGLPPTKLPADQGTLPNQOQSNQVFPSSLSLIPLTQMLTLGPDHLHLLNPAAGMTPGTQAHPLTLGVLNLPQQLQPHMLPIFVTQLGA  
QGTTLSSEELPQIFTSLSIIHSLFPGGILPTSQAGANPDVQDGSPPAGQAGVNPATQGTTPAGRLPTPSGTDDDFAVTTPAGIQRSTHATE ETTTE\*

>AMTN *Papio hamadryas*

MKTMILLFCLLGSTQSLPQLKPALGLPPTKLPADQGTLPNQOQSNQVFPSSLSLIPLTQMLTLGPDHLHLLNPAAGMTPGTQAHPLTLGVLNLPQQLQPHMLPIFVTQLGA  
QGTTLSSEELPQIFTSLSIIHSLFPGGILPTSQAGANPDVQDGSPPAGQAGVNPATQGTTPAGRLPTPSGTDDDFAVTTPAGIQRSTHATE ETTTE\*

>AMTN *Callithrix jacchus*

MKTTILLFCLLGSTQSLPQLKPALGLPPTKLPADQATLLNQOQSNQVFPSSLSLIPLTQMLTLGQDLQVKSCCRNDGWYPDPPI DPGRVECTTATATCMLPIFVTHLG  
AQGTTLSSEELPLAPQIFTGIIHSLFPGGILPTSQAGANPNVQDGRPLPAGQAGVNSAIQGTTPAGHLP IPSSTDDDFAMTTPAGIQRSTHAME ETTTESPNGIQ\*

>AMTN *Saimiri boliviensis*

MKTTILLFCLLGSTQSLPQLKPALGLPPTKLPADQATLLNQOQSNQVFPSSLSLIPLTQVLTGQDLQLLNPAAGMTPGAQTHPLTLGGLNVQQQLQPHMLPIFVTHLG  
QGTTLSSEELPLAPQIFTGIIHSLFPGGILPTSQAGANPNVQDGRPLPAGQAGVNPATQGTTPAGHFP TSSSTDDDFAMTTPAGIQRSTHATE ETTTESPNGIQ\*

>AMTN *Microcebus murinus*

MKTTILLFCLLGSTQSLPRHLNPALGLPTKLPADQATPLTQQQPQNVFPSSLSIPLTQMLTLGSDLLHLLNPAAGMTPGAQTHPLTLGGLNVQQQLQPHMLPIFVTHLG  
AQ????????PVAPHFTGLIIHPLLPGGILPPTQAGANPDGQGTSLPAGQAGVNPATHTGTEGHLPTPTDDEFGVTTAGLRRGLHTTE ETTTEPPNE???

>AMTN *Daubentonia madagascariensis*

MKTTILLFCLLGSTQSVPKHLNPALGLPPTKLPADQATLLNQOQPNVFPSSLSIPLTQMFALGSDLLHLLNPAAGMTPGAQTHPLTLGGLNVQQQLQSQMLPIFVAQLG  
AQGTTLSSEELPVAPQIFTGIIHPLFPGGILPTSQVGANPGQGGSLPAGQAGVNPATHTGTEGHHPTPRDDEFGVTPASPIQRGTHTE ETTTESPNGIQ\*

>AMTN *Tarsius syrichta*

MKTTILLFCLLGSQSLPKQLNPALGLPPTKLPADQVTLNQOQPNVFPSSLSIPLTQMLTLGSDLLQLLNPAAGMTPGAQTHPLTLGGLNVQQQLQSQMLPIFVAQLG  
GTILSSEELPVGSPFFTGLIHLPLFPGGILPTSQAGTKPDVQDGSPPAGQAGVNPATHTGTEGHHPTPRDDEFGVTPASPIQRGTHTE ETTTESPDGIQ\*

>AMTN *Otolemur garnettii*

MKTMILLFCLLGPQSLPKHLSPTLGLQPTKLPADQATLLNQOQPNVFPSSLSIPLTQMLTLGSDLLRLLSPAAGLAPGAQAHSPLGGLNAQQQLQSQMLPIFVAQLG  
QGTTLSSEELPVAPQIFTGIIHPLFPGGVLPASQARANLDVQGENLPAGTAEHLTTPRDDDESQVTPPAGIRSGTSTGSDTTELPNGIQ\*

Dermoptera

>AMTN *Galeopterus variegatus*

MKTAILLFCLLGSTQSLPKQLNPALGLPPTKLPADQATLLNQOQPNVFPSSLSIPLTQMLTLGSDLLQLLNPAAGMTPGAQTHPLTLGGLNVQQQLQSQMLPIFVAQLG  
AQGTTLSSEELPVAPQIFTGIIHPLYPGDLLPSSQAGANPDVQARIPASAGQAGANPAFQRTLPTPRGTDDDFEVATPAGIQRGLHTTE ETTTESPNGIQ\*

Euarchontoglires

Scandentia

>AMTN *Tupaia chinensis*

MKTMILLFCLLGSTQSLPKQHNPAAGLPTKLPADQATLLNQOQPKQVFPSSLSIPLTQMLTLGSDLLQLLNPAAGMTPGAQTHPLTLGGLNVQQQLQSQMLPIFVAQLG  
AQGTTLSSEELPVAPQIFTGIIHPLFPGGILSTSQTGANPEVHNGILPAGQAGVNPATQGTTPGGHLPTPSDDELDVATPAGILRGMHTTE ETTTESPNGIQ\*

>AMTN *Tupaia belangeri*

MKTMILLFCLLGSTQSLPKQHSASGLPPTKLPADQATLLNQOQPKQVFPSSLSIPLTQMLTLGSDLLQLLNPAAGMTPGAQTHPLTLGGLNVQQQLQSQMLPIFVAQLG  
AQGTTLSSEELPVAPQIFTGIIHPLFPGGILSTSQTGANPEVHNGILPAGQAGVNPATQGTTPGGHLPTPSDDELDVATPAGILRGMHTTE ETTTESPNGIQ\*

Rodentia

>AMTN *Mus musculus* [NM\_027793]

MKTMILLFCLLGSQSLPKQLNPASGVPATKPTPGQVTPLPQQQPNVFPSSLSIPLTQMLTLGSDLLPLFNPAAGPHGAHTLPFTLGPLNGQQQLQSQMLPIFVAQLG  
QGALLSSEELPLASQIFTGIIHPLFPAGIIPSGOAGTKPDVQNGVLPTRQAGAKAVNQGTTPGHVTPGVTTDDDDYEMSTPAGLRRATHTE ETTTIDPNRTQ\*

>AMTN *Rattus norvegicus* [NM\_001044296]

MKTVVLLCLLGSQAQSLPQRLSPALGAPATKPTPGQVTPLTQQQPNOVFPSSISLIPLTQLLTLGSDLPLFNPATMPHGQTTLPTLGPLNGQQQLQPQMLPIIVAQLGA  
QGALLSSEELPLASQIFFTGLLIHPLFPFGAIQPSGQTGAKPDVQNGALPTRQAGASPAQATTPGHVTPAVTDDDDYEMSTPAGLQRAHTHTEGTTMDPPNRK\*  
>AMTN Cricetulus griseus  
MKTITILLFCLLGTQSLPKQISPTLGLPPTKTADQVALLTQQQPNOVFPSSISLIPLTQLLTLGSDLQLLNPAATGLAHGAQALPFTLGPLNRQQQLQSQMLPIIVAQLGA  
QGTTLSSEELPLASQIFFTGLLIHPLFPFGGILPSSQTGAKPDGQNGVLPTRQAGANPAVQGTQGHVTPGVTDVDDDDYETSTPAGIRRGHTHTEGTTIDTPNRQ\*  
>AMTN Mesocricetus auratus  
MKTITILLFCLLGTQSLPKQISPALGLPATKTADQVLLTQQQSNQVFPSSISLIPLTQLLTLGSDLQL????????????????????????????????????MLPIIVAQLGA  
QGTTLSSEELPLASQIFFTGLLIHPLFPFGGILPSSQTGAKPDVQNGVLPTRQAGANPAVQGTQGYITTPGVTDVDDDDYEMSTPAGIRRGHTHTEGTTIDTPNRQ\*  
>AMTN Peromyscus maniculatus  
MKTITILLFCLLGTQSLPKQIRPTLGFPTTSPDQGTQLTQEQANQVFPSSISLIPLAQLLTLGSDLQLLNPAATGPAHGTQTFPPLGPLNRQQQLQPQMLPIIVAPLGA  
QGALLSSEELPLASQIFFTGLLIHPLFPFGGILPSSQTGAKPDAQTVLPTRQAGASPAVQGTQSQVTPGVTDVDDDDYETSTPAGMRRGHTHTEGTTIDTPNRQ\*  
>AMTN Microtus ochrogaster  
MKTITILLFCLLGSQAQSLPKQINPALGLPPTKTPDQVALLSQQQPNOVFPSSISLIPLAQLLTLGSDLQLLNPAATGLAHGAQTLPTLGPLSRSQQQLQPQMLPIIVTQLGA  
QGTFLSSEELPLASQIFFTGLLIHPLFPFGGILPSSQTGAKPDAQNGVLPTRQAGTSPATQGTQGHVTPAVTDDDDYEMSTAGMRRGHTHTEGTTIDTPNRTHKDLLD  
\*  
>AMTN Jaculus jaculus  
MKTITILLFCLLGTQSLPKQINPASGLPPTKPADQVMLVKQQLPSQVLPSSLIPLTQVLAALGADLQLISPSTGVAPGTQTRPVSLGALNGQQQLQPQMLPIIVAQLG  
AQGTTLSSEELPLASQVFTGLFLHPLFPGSILPTNQAGSNPDAQKGVLPAGQGTIQTGTEGHPVSTDDDFAMTTPAGLRKGVHTTGETTPESTSGIH\*  
>AMTN Dipodomys ordii  
MKTITILLFCLLGTQSLPKQNPNTLGYPTKPTPEQVTLNQQQSHQVFPSSISLIPLTHLFTLGSDDLQFNHATGIAPGHTLPTLGPLNGQQQLPSQMLPIIVASLG  
AQSTILSSEELPLASQIFFTGLLIHPLFPFGNIPPTSQTGTPGAGDGVFPAGQAGVKAIPAIQGTTESHISTPSVTDDDFGGTTPAGIRRMHTTVEETTAD\*  
>AMTN Cavia porcellus  
MKTIVILLGGLLQWASLQSLPKQNSALEVSPTKPADQVTPLSQQQPTQVFPSSISLIPLTQLLTLASDLQLLTPASGTPKAQTLQLSLGALQGNQQLQPQLLPIFVAQLG  
APAAILSSEELPLAQIFFTGLLNLPLFPFGTLPTSQAGASPNIQEEAIPAGQTVNNTMNVTTTEGQLSTPGVTDVDDDFEVTTGLIQKVHTTPEKTTTGSFN\*  
>AMTN Octodon degus  
MKTITILLFCLLGSQAQSLPKQNSALEVSPTKPTDQVTPKQQQSSQVFPSSISLIPLTQLLTLGSDLQLLTPAPGATPAAHTLPLTLGVNGQNLQPQTLPIFVAQLG  
AQAAILSSEELPLGPQIFFTGLLHPLFPFGGILPISQAGANPDQGDGALPAGQGANANIQATTVGQLSTSGVTDVDDDFEVTTAGIQRATHHTTKGITGSPNRIH\*  
>AMTN Chinchilla laniger  
aMKTITILLFCLLGTQALPKQNSALEVSPTKPADQVTPLSQQQPGVFPSSISLIPLTHLLTLGSDLQLLSPAPGATPAAHTLPLPLGALNGQNLQPQMLPIFVAQF  
GAQAAILSSEELPLGPQIFFTGLLHPLFPFGGILPTSQAGANPDQGDGALPAGQGANANIQATTEGQLSTPGVTDVDDDFEVTTAGIQKATHHTKETTSSPNRIH\*  
>AMTN Heterocephalus glaber  
MKTITILLFCLLGTQSLPKQNSALEVSPTKLAPDQVTPLTQQQPSQVFPSSISLIPLTQLLTLGSDLRLTPAPGLPAGQKPLTLGALNGQNLQPQMLPIFVAQIG  
AQATILSSEELPLGSQIFFTGLLHPLFPFGGILPTSQSGANLDAQNGALPGQAGANANIQATPEGHLLTPGVTDVDDDFEATTPAGIQRATHHTTKGITGSPNGTQ\*  
>AMTN Fukomys damarensis  
MKTITILLFCLLGTQSLPKQNSALEASPTKPADQVTTVTQQQPSQVFPSSISLIPLTQLLTLGSDLQLLTPAPGAAPGAQKPLTLGALNGQNLQPQVLPFVQVGA  
QATMLSSEELPLGSQIFFTGLLHPLFPFGGILPTSQVGANPDAQDQALPVGQAGANANIQATPEGHLLTPGVTDVDDDFEATTPAGIQRATHHTTKGITGSPNGIH\*  
>AMTN Nannospalax galili  
MKTITILLFCLLGTQSLPKQNSALEVSPTKPTPNQVTLQNLQQQPSQVFPSSISLIPLTQLLTLGSDLQLLSPATGMAPGAQTIPLTLGSLNGQQQLQPQMLPIIVARLGA  
AQGTTLSSEELPLAQIFFTGLLIHPLFPFGGILPSSQAGANPGVQNGVLPAGQAGANSAIQGTQGHLPPTGVTDVDDYGMSTPAGMRRGHTHTEETTSPNGIH\*  
>AMTN Ictidomys (Spermophilus) tridecemlineatus  
MKTITILLFCLLGTQSLPKQNLGLAPTKPADQASQLNQQQPNQVFPSSISLIPLTQLLTLGADLQFNPAIGMAPGAQTLPLTLGALNGQQQLQSQMLPIIVAQLGAQ  
GTILSSEELPLAQIFFTGLLIHPLFPFGGILPQTNQAGANPDAQDQVLPAGQTVNPTNQGTTPASHLATPTGIDDEDFEATTPAGIRRGHTTDETTTSPNRIH\*  
Lagomorpha  
>AMTN Oryctolagus cuniculus  
MKTITILLFCLLGTQSLPKQNSALEVSPTKPADQVTLNQQQPSQVFPSSISLIPLTQMLTLNPAAGMAPGAQTLPLTLKLDGQQQLQPQILPIIVAQLGTQGTIL  
SSEEVPAAPHIFFTGLLHPLFTSQTAAANADSQDEVLPQAGVNPATRAPADDIGVTTAGIQRSTPVTEETTSPKGIQ\*  
>AMTN Ochotona princeps  
MKTITILLFCLLGTQSLPKQNSALEVSPTKPADQVTLNQQQPSQVFPSSISLIPLTQMLTLVSTLLNPAAGAAATGAQTLPLTLMEILEAQKQLQTOMLPIIVAQL  
GAQAVLSSEELPAAPQILTGLLHPLFPFGGILPSSQAGANPDQAGVLPAGQAGVNPATRAPADDIGVTTAGIQRSTPVTEETTSPKGIH\*  
Laurasiatheria  
Carnivora  
>AMTN Felis catus  
MKTITILLYLLGSTQSLPTQLNPAALGLPPTKALDQATLLNQQQNLQVFPSSISLIPLTQMITLGLADLQLLNPPAGLAPGTQTLPLTLGGLNTQQPLQAQMLPVIIVAHGA  
QGTILSSEELPMAPQIFFTGLIFQPLFPFGSTLPSQANPDAQNGILPAGQAGMNAIQGTSEGFSTPSTDDDFEVTAFTGIRRMHTTQETTTGPPNGNQ\*  
>AMTN Panthera tigris  
MKTITILLYLLGSTQSLPTQLNPAALGLPPTKALDQATLLNQHQLNQQVFPSSISLIPLTQMITLGLADLQLLNPPAGLAPGTQTLPLTLGGLNTQQPLQAQMLPVIIVAHGA  
QGTILSSEELPMAPQIFFTGLIFQPLFPFGSILPNSQANPDAQNGILPAGQAGMNAIQGTSEGFSTPSTDDDFEVTAFTGIRRMHTTQETTTGPPNGNQ\*  
>AMTN Canis familiaris  
MKTITILLYLLGSTQSLPAQNLNPAALGLPPTKALDQATLLNQQQPNQVFPSSISLIPLTQMFTLASDLQLLNPAAGMASGTQTLPLSLGVLNTQQQLQPQMLPVIIVAHG  
AHGAILSSEELPSPQIFFTGLIFQPLFPFGAILPTSPANPDAQNGILPAGQAGVNPATRAPADDIGVTTAGIQRSTPVTEETTSPKGIQ\*  
>AMTN Mustela putorius [JP005519]  
MKTITILLYLLGSTQSLPTQLNPAALGLPPTKAPHQATLLNQQQPNQVFPSSISLIPLTQMLTLGADLQLLNPAAGMPPGPQTLPLSLGVLNTQQQLQSQMLPVIIVAHG  
AHGAILSSEELPVPKIFFTGLLQPLFPFGAILPTSPANPDAQNGILPAGQAGVNPATRAPADDIGVTTAGIQRSTPVTEETTSPKGIQ\*  
>AMTN Ailuropoda melanoleuca  
MKTITILLYLLGSTRSLPTQLNPAALGLPPTKAPHQAKLLNQQQPNQVFPSSISLIPLTQMFTLGSDLQLLNPAAGMAPGIQTLPLSLGVLNTQQQLQSQMLPVIIVAHG  
THGAILSSEELPVPKIFFTGLLQPLFPFGAILPTSPANPDAQNGILPAGQAGVNPATRAPADDIGVTTAGIQRSTPVTEETTSPKGIQ\*  
>AMTN Ursus maritimus  
MKTITILLYLLGSTRSLPTQLNPAALGLPPTKAPHQATLLNQQQPNQVFPSSISLIPLTQMFTLGSDLQLLNPAAGMAPGTQTLPLSLGVLNTQQQLQPQMLPVIIVAHG  
THGAILSSEELPVPKIFFTGLLQPLFPFGAILPTSPANPDAQNGILPAGQAGVNPATRAPADDIGVTTAGIQRSTPVTEETTSPKGIQ\*  
>AMTN Odobenus rosmarus  
MKTITILLYLLGSTQSLPTQFNALGLPPTKAPHQATLLNQQQPNQVFPSSISLIPLTQMFTLGSDLQLLNPAAGMAPGTQTLPLNGLGNTQQQLQPQMLPVIIVAHG  
AHGAILSSEELPVPKIFFTGLLQPLFPFGAILPTSPANPDAQNGILPAGQAGVNPATRAPADDIGVTTAGIQRSTPVTEETTSPKGIQ\*  
>AMTN Leptonychotes weddellii  
MKAMILLYLLGSTQSLPTQLNPAALGLPPTKAPHQATLLNQQQPNQVFPSSISLIPLTQMFALGSDLQLLNPAAGMAPGTQTLPLNGLGNTQQQLQPQMLPVIIVAYLGA  
AHGAILSSEELPVPKIFFTGLLQPLFPFGAILPTSPANPDAQNGILPAGQAGVNPATRAPADDIGVTTAGIQRSTPVTEETTSPKGIQ\*  
Cetartiodactyla

>AMTN Bos taurus  
MKAAILLFCLLGSTLSLPMQLNPALVLPPTKLVDPQATLLNPQQPNQVSSLSLIPLTHMLTLGSLNQLLNPAAGMPSGTQTLPLALGGLKVQQQLQPQMLPVIVAHF  
AQGTILSSEELQGTSQLTGLIFHPLFPGAILPTSQANPDAQNGILPAGQAGANPAAQGTPEDFPSTPSGTDDDFASTTPAGIQRGRPTTEETPTGSPKGIQ\*  
>AMTN Bos grunniens  
MKAAILLFCLLGSTLSLPMQLNPALVLPPTKLVDPQATLLNPQQPNQVSSLSLIPLTHMLTLGSLNQLLNPAAGMPSGTQTLPLALGGLKVQQQLQPQMLPVIVAHF  
AQGTILSSEELQGTSQLTGLIFHPLFPGAILPTSQANPDAQNGILPAGQAGANPAAQGTPEDFPSTPSGTDDDFASTTPAGIQRGRPTTEETPTGSPKGIQ\*  
>AMTN Bos indicus  
MKAAILLFCLLGSTLSLPMQLNPALVLPPTKLVDPQATLLNPQQPSQVSSLSLIPLTHMLTLGSLNQLLNPAAGMPSGTQTLPLALGGLKVQQQLQPQMLPVIVAHF  
AQGTILSSEELQGTSQLTGLIFHPLFPGAILPTSQANPDAQNGILPAGQAGANPAAQGTPEDFPSTPSGTEDDFASTTPAGIQRGRPTTEETPTGSPKGIQ\*  
>AMTN Pantholops hodgsonii  
MKAAILLFCLLGSTLSLPMQLNPALVLPPTKLVDPQATLLNPQQPSQVSSLSLIPLTHMLTLGSDQLLNPAAGMPSGTQTLPLALGGLKVQQQLQPQMLPVIVAHF  
AQGTILSSEELQGTSQLTGLIFHPLFPGAILPTSQANPDAQNGILPAGQAGANPATQGTSEDFFPSTPSGTDDDFAAATTPAGIQRGRPTTEETPTGSPKGIQ\*  
>AMTN Capra hircus  
MKAAILLFCLLGSTLSLPMQLNPALVLPPTKLVDPQATLLNPQQPSQVSSLSLIPLTHMLTLGSDQLLNPAAGMPSGTQTLPLALGGLKVQQQLQPQMLPVIVAHF  
AQGTILSSEELQGTSQLTGLIFHPLFPGAILPTSQANPDAQNGILPAGQAGANPATQGTPEDFPSTPSGTDDDFAAATTPAGIQRGRPTTEETPTGSPKGIQ\*  
>AMTN Ovis aries  
MKAAILLFCLLGSTLSLPMQLNPALVLPPTKLVDPQATLLNPQQPSQVSSLSLIPLTHMLTLGSDQLLNPAAGMPSGTQTLPLALGGLKVQQQLQVSSKPYSMPLV  
IVAHFQAQGTILSSEELQGTSQLTGLIFHPLFPGAILPTSQANPDAQNGILPAGQAGANPATQGTPEDFPSTPSGTDDDFAAATTPAGIQRGRPTTEETPTGSPKGIQ\*  
>AMTN Sus scrofa  
MKTITILLFCLLGSTLSLPMQFNPLVGLPPTKLVDPQATLRNQQPNQVFPSSLSLIPLTQMLTLGSDQLLNPAIGMVPSSQTLPLTLGALNVQQQLQPQMLPVIVAHLG  
AQGAILSSEELPATRQILTGLIFHTLFPGAILPPSPAKPDAQNGIHPAGQAGANPAVQGTTPRGFPPTSSGTDDDFVVTTPAGIQRGRPTTEETPTGSPNGMIQ\*  
>AMTN Vicugna pacos  
MKTITILLFCLLGSTLSLPMQVNPVLPPTKLVDPQATPLNQQPNQVFPSSLSLIPLTQMLTLGSDQLLNPAAGMPSGTQTLPLTLGGLNVKQQQLRQPLPVIVAHLGV  
GTILSSEELPAAPQIFFTGLIFHPLFPGAIQPTSQANPDVQNGILPAGQAGVNSANQGTTPRGPLPTSSGTDDDFVVTTPAGIQRGRPTTEETPTGSPNGMIQ\*  
>AMTN Camelus ferus  
MKTITILLFCLLGSTLSLPMQNLPTLGLPPTKLVDPQATPLNQQPNQVFPSSLSLIPLTQMLTLGSDQLLNPAAGMPSGTQTLPLTLGGLNMKQQQLQPQMLPVIVAHLGV  
GTILSSEELPAAPQIFFTGLIFHPLFPGAIQPTSQANPDVQNGILPAGQAGVNSANQGTTPWGPLPTSSGTDDDFVVTTPAGIQRGRPTTEETPTGSPNGMIQ\*  
>AMTN Orcinus orca  
MKTITILLFCLLGSTLSLPMQNLNPALVLPPTKLVDPQATLLNQQPNQVFPSSLSLIPLTQMLTLGSDQLLNPAAGMPSGTQTLPLTLGGLKVQQQLQPQMLPVIVAHLG  
AQGAILSSEELPATRQILTGLIFHPLFPGAILPTSQATPDVQNGILPAGQAGANPAIRGNSEGFPTTSGTDDDFAAETTPVGIQRGIHTTEETPTGSPKGI\*  
>AMTN Tursiops truncatus  
MKTITILLFCLLGSTLSLPMQNLNPALVLPPTKLVDPQATLLNQQPNQVFPSSLSLIPLTQMLTLGSDQLLNPAAGMPSGTQTLPLTLGGLKVQQQLQPQMLPVIVAHLG  
AQGAILSSEELPATRQILTGLIFHPLFPGAILPTCPPAHLPTCPPDVQNGILPAGQAGANPAIRGNSEGFPTTSGTDDDFAAETTPVGIQRGIHTTEETPTGSPKGI\*  
>AMTN Physeter catodon  
MKTITILLFCLLGSTLSLPMQNLNPALVLPPTKLVDPQATLRNQQPNQVFPSSLSLIPLTQMLTLGSDQLLNPAAGMPSGTQTLPLTLGGLKVQQQLQPQMLPVIVAHLG  
AQGTILSSEELPATRQILTGLIFHPLFPGAILPTSQATPDVQNGILPAGQAGANPAIQGTPEGFPTTSGRDNFAETTPAGIQRGRPTTEETPTGSPKGI\*  
>AMTN Balaenoptera acutorostrata  
MKTITILLFCLLGSTLSLPMQNLNPALVLPPTKLVDPQATLLNQQPNQVFPSSLSLIPLTQMLTLGSDQLLNPAAGMPSGTQTLPLTLGGLKVQQQLQPQMLPVIVAHLG  
GAILSSDELPAAPQIFFTGLIFHPLFPGAILPTSQATPDVQNGILPAGQAGANPAIQGTPEGFPTTSGTDDDFAAETTPAGIQRGRPTTEETPTGSPKGI\*  
Eulipotyphla  
>AMTN Erinaceus europaeus  
MKTITILLFCLLGSTHTLPMQNLNPALGLPPTKLVDPQATLLSQPNQVFPSSLNLIPLTQMLTLGSDQLLNPAAGMPSGTQTLPLTLGGLNVQQQLQPQMLPIIVAQLG  
AQGTILSSEELPVASQIILGLLQPLLPGLSILSTKANPDQNGILPAGQAGANPAIQEDTEAPFSTPSGIDDDFGMTTPAGIQRGLQPTTEETPTGSPNGLIQ\*  
>AMTN Sorex araneus  
MKTITILLFCLLGSTQSLPMQNLNHALGLPPTKLVDPQATLNQQPNQVFPSSLSLIPLTQILTGLSDQLRNPAPGAQTPLPLSLGAVNGQQQLQPQMLPVIVAQLGAQGT  
ILSSEELPVASPLLTGLVFPQLLQGAILPNSQINPDHNRILPAGQAKPNPALHGTPEGLPTPSGIDDDFVVTTPAGIQRGLHPEETTTESPEGFQ\*  
>AMTN Condylura cristata  
MKTITILLFCLLGSTQSLPMQNLNPALVLPPTKLVDPQATLLNQQPNQVFPSSLSLIPLTQMLTLGSDQLLNPAAGMPSGTQTLPLTLGGLNAQQQLQPQMLPVIVAQLG  
AQGTILSSEELPVASQIIFAGLIFQPLFPGAILPTSQANPDAQNGILPAGQAGVNPAINQGTPEGFPLTPSAIDDDYGVVTTPAGIQRGLHTTEETPTGLPDGIQ\*  
Chiroptera  
>AMTN Eptesicus fuscus  
MKTIVILLFLLYGSTQSLPMQFKPALGLPPTQLVDPQATLRNQQPNQVFPSSLSLIPLTPMLTMGSDQLLNPPARMAPAAHTLPLTLGGLNVQQQLQPQMLPLIVAQL  
GAQGTILSSEELPVAPQIFFTGLIFHPLFSGAILPTSHANPDVQNTILPAGQTVNPAIQGTPEGSPSTPSGTDDDFEVTTTPAGIQRGMHIAEETTTTEFPNGIQ\*  
>AMTN Myotis davidii  
MKTIVILLFLLYGSTQSLPMQKPKALGLPPTQLVDPQATLLNQQPNQVFPSSLSLIPLTQMLTMVSDQLLNPPARMAPAAHTLPLALGGLNVQQQLQHQVPLPLIVAQL  
GAQGTILSSEELPVAPQIFFTGLIFHPLLSGAILPTSQANPDIQNTILPAGQAGVNPAINQGAPEGSPSTPSVTDDDFEVTTTPAGIQRGMHIAEETTTGFHHGIQ\*  
>AMTN Myotis lucifugus  
MKTIVILLFLLYGSTQSLPMQKPKALGLPPTQLVDPQATLLNQQPNQVFPSSLSLIPLTQMLTMVSDQLLNPPARMAPAAHTLPLALGGLNVQQQLQPQMLPLIVAQL  
GAQGTILSSEELPVAPQIFFTGLIFHPLFSGAILPTSHANPDIQNTILPAGQAGVNPAINQGAPEGSPSTPSGTDDDFEVTTTPAGIQRGMHIAEETTTGFPHGIQ\*  
>AMTN Pteropus alecto  
MKTITILLFCLLGSTQALPIQLNPALRLPPTKLVDPQATLLNQQPNQVFPSSLVIPLTQMLTLGSDQLLNPAAGMPSGTQTLPLTLGALNVQQQLQPQMLPVIVAQLG  
AQGTILSSEELPVAPQIFAGLIFQPLLSGAILPTSQANPDVQNGILPAGQAGINPPIRRAPGSPFPTPSGAGNDFGVTTTPAGIQRGMLTTEETTTGSPSGIR\*  
>AMTN Pteropus vampyrus  
MKTITILLFCLLGSTQALPIQLNPALRLPPTKLVDPQATLLNQQPNQVFPSSLVIPLTQMLTLGSDQLLNPAAGMPSGTQTLPLTLGALNVQQQLQPQMLPVIVAQLG  
AQGTILSSEELPVAPQIFAGLIFQPLLSGAILPTSQANPDVQNGILPAGQAGINPPIRRAPGSPFPTPSGAGNDFGVTTTPAGIQRGMLTTEETTTGSPSGIR\*  
Perissodactyla  
>AMTN Equus caballus  
MKTIVILLFCLLGSTLSLPMQFPALGLPPTKVPVDPQATQLNQQPNQVFPSSLNLIPLTQMLKLGSDQLLNPAAGVAPGAQTPLPLTLGGLKAQQQLQSOMLPIFVAQFGA  
QGTILSSEELPAAPQIFAGLIFQPLFPGGILPTSQATPDVQNGILPAGQGGVKAIQGTSESLPTTSDTDDDFGGTTPAGIQRGMRTTEETITKSPNGIQ\*  
>AMTN Ceratotherium simum  
MKTITILLFCLLGSTLSLPMQSPPLGLPPTKLVDPQATLLNQQPNQVFPSSLSLMLTQMLTLGSDRQQLNPAAGVAPGAQTPLPLTLGGLKAQQQLQSOMLPIFVAQIG  
AQGTILSSEELPVARQIFFTSLIFQPLFPGAILPTSQANPDVQNGILPAGQGGVKAIQGTSESLPTTSDTDDDFGGTTPAGIQRGRPTTEETTTTRSPNGIQ\*  
Xenarthra  
>AMTN Dasypus novemcinctus [JX523656] (pseudogene)  
?????????????????KQFNSALALPSAKLVPGQETLLNQQLPNQVFPPLTLIPLTQMLTLGSDQLLNPSAEITSSTQIALTLGDLYKQQQLQPQILPIILAQLGA  
QGIILSSEELPVAPQIFFTGLIFQPLFPGAILPTTQPEANPDVQCGVLPAGQAGINPSIQGTPEGYFPIIPRAERMALE\*PFLEASKGHTHPLRKP\*SYQVEFIK
