# Supplementary material for: Amelotin: an enamel matrix protein that experienced distinct evolutionary histories in amphibians, sauropsids and mammals
Source: PubMed Central journal article supplement (PMC4373244; doi:10.1186/s12862-015-0329-x), 2015-03-14
Supplement: 12862_2015_329_MOESM3_ESM.pdf [file 12862_2015_329_MOESM3_ESM.pdf]

| Species                       | Primers                                                      | Target region                 | Annealing temperature |
|-------------------------------|--------------------------------------------------------------|-------------------------------|-----------------------|
| <i>Anolis carolinensis</i>    | F: CAACAGCAAGATACCAATTTGG<br>R: GCAGTGACACACATCATTGG         | 5' UTR to 3' UTR              | 50°C                  |
|                               | Probe:<br>F: GGTTCCAGATCAGCATCCAT<br>R: ATTCAGGCCATCTTCAGTCG | exon 3a to exon 8             | 58°C                  |
| <i>Python regius</i>          | F: AGTCGTGGGGTAAGAGATGC<br>R: TGCTTTCCTTTCTGAGCTG            | 5' UTR to 3' UTR              | 59°C                  |
| <i>Takydromus sexlineatus</i> | F: ATGAAGATTGTAATTTTACT<br>R: CATTTCCTCAGAGCTGAGCA           | exon 2a to exon 7             | 50°C                  |
|                               | F: ATATTACGGCTGWTGCAAAG<br>R: GGTGGTTCCCGAAGTTCAGTTG         | exon 2c to exon 8<br>(3' end) | 50°C                  |
| <i>Tarentola mauritanica</i>  | F: CTACAAGCAACAGCAGAGA<br>R: CTRTCTCCTCTCACARGTG             | exon 2b to exon 8<br>(3' end) | 50°C                  |
| <i>Caiman crocodilus</i>      | F: TTTACCAGTGCGACAAGCTG<br>R: TCTCCTCTCACAGGGGATACAC         | exon 2b to exon 8<br>(3' end) | 60°C                  |
| <i>Xenopus tropicalis</i>     | F: GTTCCACAGAAATATATGGTCATG<br>R: GCAACTCTAAACAAATCTACAGAC   | 5' UTR to 3' UTR              | 55°C                  |
| <i>Pleurodeles waltl</i>      | F: AGAAACATTCGGGACTGGTG<br>R: TTGCCAGATTGTGATCGT             | 5' UTR to 3' UTR              | 60°C                  |
|                               | Probe:<br>F: ACCAGGCTTTCACAGTCAC<br>R: ATCACCTCTCGCTACGCTGT  | exon 3b to exon 8<br>(3' end) | 62°C                  |

### Additional file 3
